# Supplementary material for: Synaptic GABA release prevents GABA transporter type-1 reversal during excessive network activity
Source: PubMed Central journal article supplement (PMC4374149; doi:10.1038/ncomms7597), 2015-03-23
Supplement: NIHMS62186-supplement-1.pdf [file NIHMS62186-supplement-1.pdf]

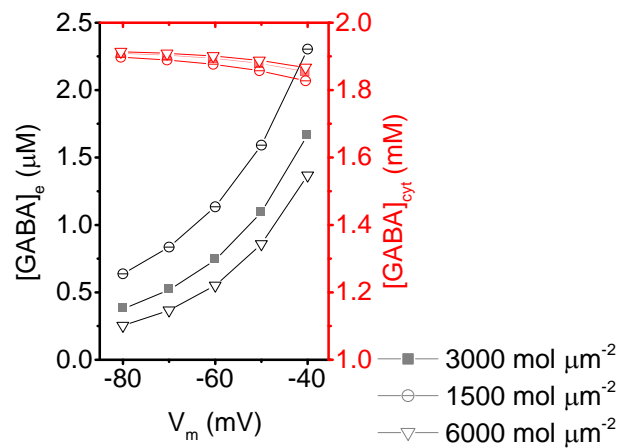

**Supplementary Figure 1. GABA concentrations at different GAT-1 densities.** Computer simulations showing membrane potential dependence of the steady-state extracellular GABA concentrations ( $[\text{GABA}]_e$ ; *black*) and cytosolic GABA concentrations ( $[\text{GABA}]_{\text{cyt}}$ ; *red*) at different GAT-1 densities. Synaptic release rate is 2 Hz; filled symbols show corresponding values from Fig. 1d for comparison.

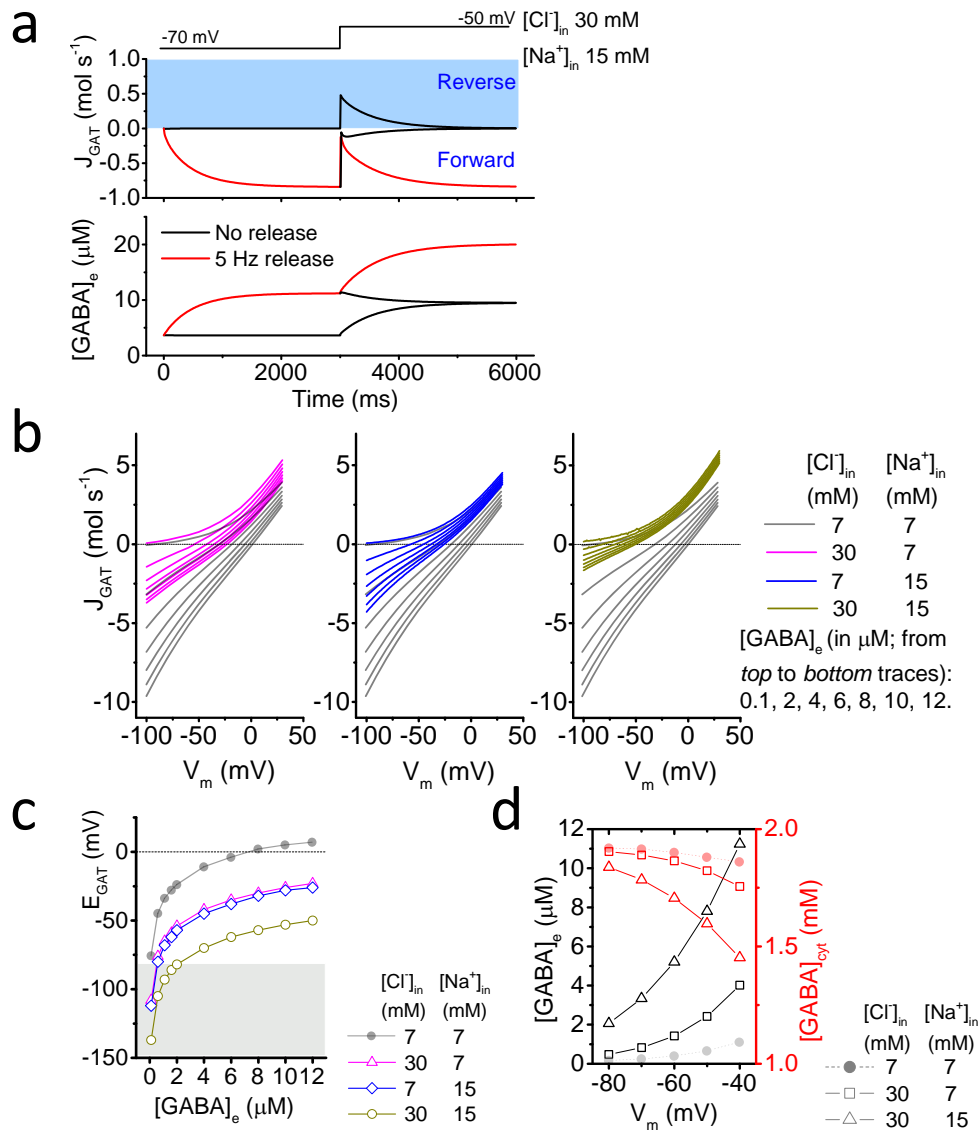

**Supplementary Figure 2. GAT-1 activity and GABA concentrations at high levels of internal Cl<sup>-</sup> and Na<sup>+</sup>.** (a) Computer simulations showing the effect of depolarization on the dynamics of GAT-1 operation and extracellular GABA concentration ( $[GABA]_e$ ) with (red) and without (black) synaptic GABA release. (b) Current-voltage relationships of the steady-state GAT-1-mediated current ( $J_{GAT}$ , molecules per s; negative values – forward mode, positive values – reverse mode) at different concentrations of extracellular GABA ( $[GABA]_e$ ) as in Fig. 1a). A family of traces from Fig. 1a ( $[Cl^-]_{in} = 7$  mM;  $[Na^+]_{in} = 7$  mM) is shown in gray for comparison. (c) Dependence of GAT-1 reversal potential ( $E_{GAT}$ ) on the concentration of extracellular GABA at different values of internal Cl<sup>-</sup> and Na<sup>+</sup>. White area, physiologically relevant membrane potentials. (d) Membrane potential ( $V_m$ ) dependence of the steady-state cytosolic ( $[GABA]_{cyt}$ ) and extracellular GABA at different values of internal Cl<sup>-</sup> and Na<sup>+</sup> in the absence of synaptic release (filled symbols show corresponding values from Fig. 1c for comparison).

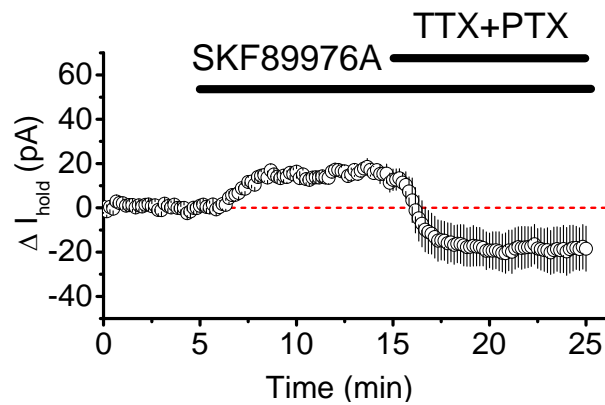

**Supplementary Figure 3. Inhibition of GAT-1 increases tonic GABA<sub>A</sub>R-mediated currents.** Holding current ( $I_{\text{hold}}$ ) changes in CA1 pyramidal neurons induced by application of SKF899976A in the absence of epileptiform activity (normal  $\text{Mg}^{2+}$  aCSF;  $V_{\text{hold}} = 0$  mV; low  $\text{Cl}^-$  intracellular recording solution; c.f. Fig. 4a;  $n = 5$ ). TTX, tetrodotoxin; PTX, picrotoxin. Error bars, s.e.m.

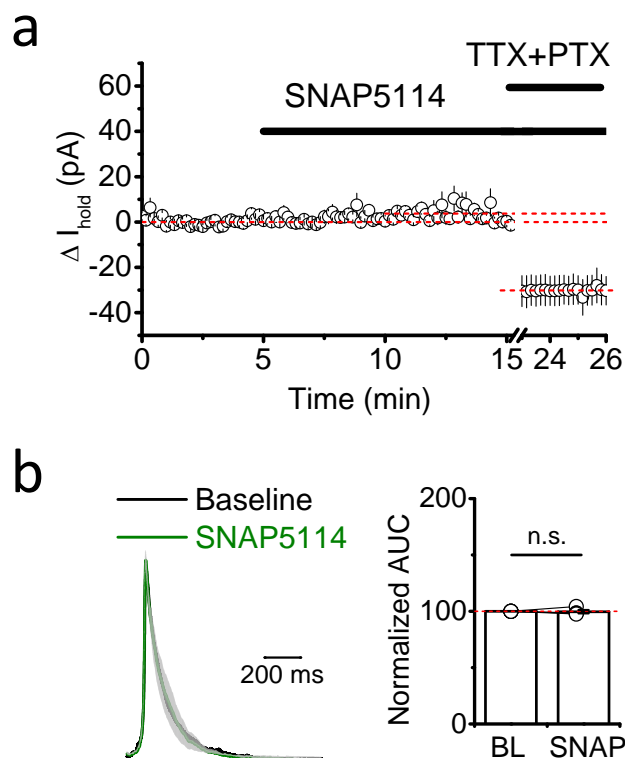

**Supplementary Figure 4. GAT-3 impact on GABA<sub>A</sub>R currents during epileptiform**

**activity.** (a) Tonic GABA<sub>A</sub> receptor-mediated currents in CA1 pyramidal neurons following application of SNAP5114 (100  $\mu$ M) during ongoing epileptiform activity (n = 5). (b) Mean normalized traces of GABA<sub>A</sub>R transients (*gray*: s.e.m.) show lack of effect of GAT-3 inhibition on the kinetics of burst-associated GABA<sub>A</sub>R transients in pyramidal neurons (area under the curve, AUC, baseline:  $60.9 \pm 14.8$  ms, in SNAP5114:  $60.3 \pm 14.1$  ms; n = 4; p = 0.54, paired t-test). TTX, tetrodotoxin; PTX, picrotoxin. Bars, mean; error bars, s.e.m.; circles, individual experiments.

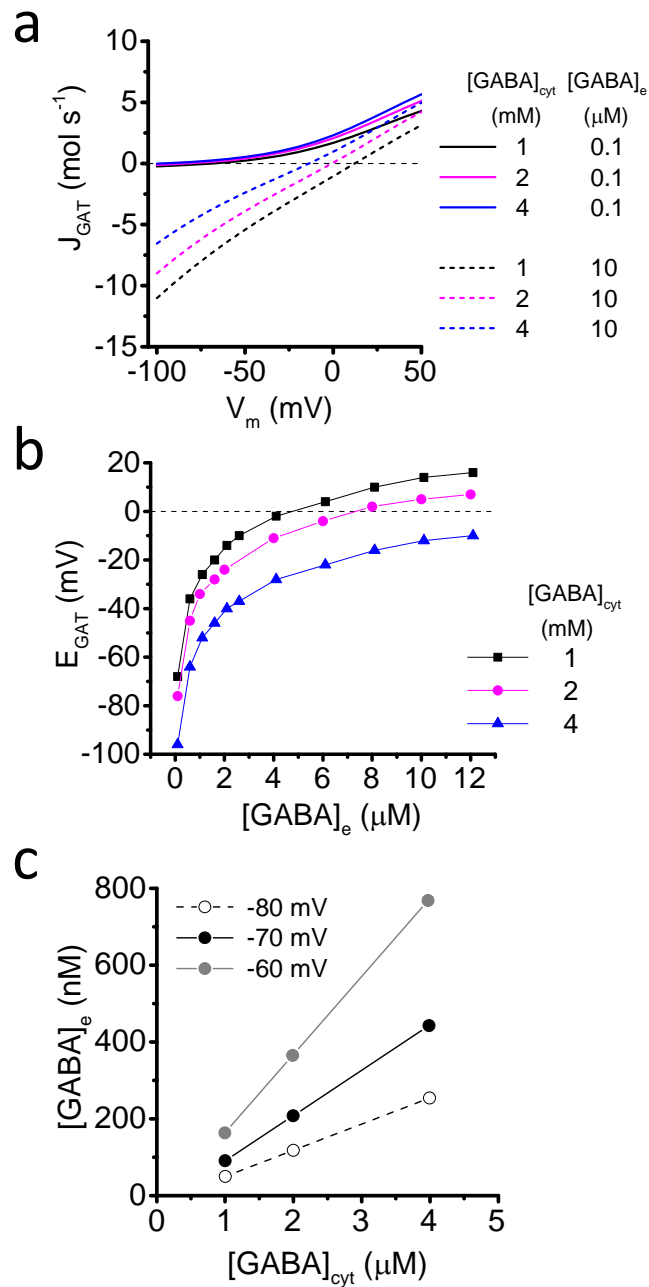

**Supplementary Figure 5. GAT-1 simulations at different cytosolic GABA**

**concentrations.** (a) Current-voltage relationship of the steady-state GAT-1-mediated current ( $J_{GAT}$ , molecules per s; negative values – forward mode, positive values – reverse mode) at different concentrations of the cytosolic ( $[GABA]_{cyt}$ ) and extracellular ( $[GABA]_e$ ) GABA. (b) Dependence of GAT-1 reversal potential ( $E_{GAT}$ ) on the concentration of extracellular GABA. (c) Steady-state extracellular GABA concentrations vs. cytosolic GABA at different subthreshold membrane potentials.
